# Supplementary material for: Nafion–polyfurfuryl alcohol nanocomposite membranes with low methanol permeation
Source: Royal Society of Chemistry journal article supplement (doi:10.1039/b315742c), 2004-01-01
Supplement: b315742c.doc [file b315742c.doc]

Electronic Supplementary Information (ESI) available:

**MEA preparation and test.** The cathode electrode for the membrane–electrode assembly (MEA) was prepared by pasting 60 wt% Pt catalyst on carbon (Vulcan 72) mixed with 5 wt% Nafion solution (Aldrich) onto a teflonized carbon cloth (E-TEK) and drying in air at 80°C for 1 h. The anode was prepared by pasting 60 wt% 1:1 PtRu on carbon mixed with a binder 411 (4 parts of 1wt% carboxymethyl cellulose sodium salt, 1 part of 10 wt% polytetrafluroethylene dispersion, and 1 part of 10 wt% styrene butadiene rubber emulsion, by volume) onto a carbon cloth (E-TEK) and drying in air at 80°C for 1 h. Both electrodes prepared were then coated with Nafion solution (5wt% Nafion solution, Aldrich) and dried at 80°C. The metal loadings in cathode and anode were both at 2.0 mg cm-2. The MEAs were fabricated by hot-pressing the anode and cathode onto opposite sides of a Nafion-115 membrane or a Nafion-PFA nanocomposite membrane at 140°C for 3 min. The performances of MEAs were evaluated in a self-made test cell system with a 4.0 cm2 active area using galvanostatic technique. A 1M methanol solution was flowed past the anode at about 10 ml/min and ambient air was fled to the cathode.
